# Supplementary material for: Network Analysis for the Discovery of Common Oncogenic Biomarkers in Liver Cancer Experimental Models
Source: MDPI journal article supplement (doi:10.3390/biomedicines11020342), 2023-01-25
Supplement: s1 [file s1]

# Network analysis for the discovery of common oncogenic biomarkers in liver cancer experimental models

Loraine Kay D. Cabral<sup>1,2,\*</sup>, Pablo J. Giraudi<sup>1</sup>, Gianluigi Giannelli<sup>3</sup>, Francesco Dituri<sup>3</sup>, Roberto Negro<sup>3</sup>, Claudio Tiribelli<sup>1</sup> and Caecilia H. C. Sukowati<sup>1,4</sup>

<sup>1</sup> Fondazione Italiana Fegato ONLUS, AREA Science Park, Campus Basovizza, 34149 Trieste, Italy

<sup>2</sup> Doctoral School in Molecular Biomedicine, University of Trieste, 34127 Trieste, Italy

<sup>3</sup> National Institute of Gastroenterology “S. De Bellis” Research Hospital, 70013 Bari, Italy

<sup>4</sup> Eijkman Research Center for Molecular Biology, National Research and Innovation Agency of Indonesia (BRIN), B.J. Habibie Building, Jl. M.H. Thamrin No. 8, Jakarta Pusat 10340, Indonesia

\* Correspondence: caecilia.sukowati@fegato.it

Supplemental Data

Hoshida *et al.* datasets

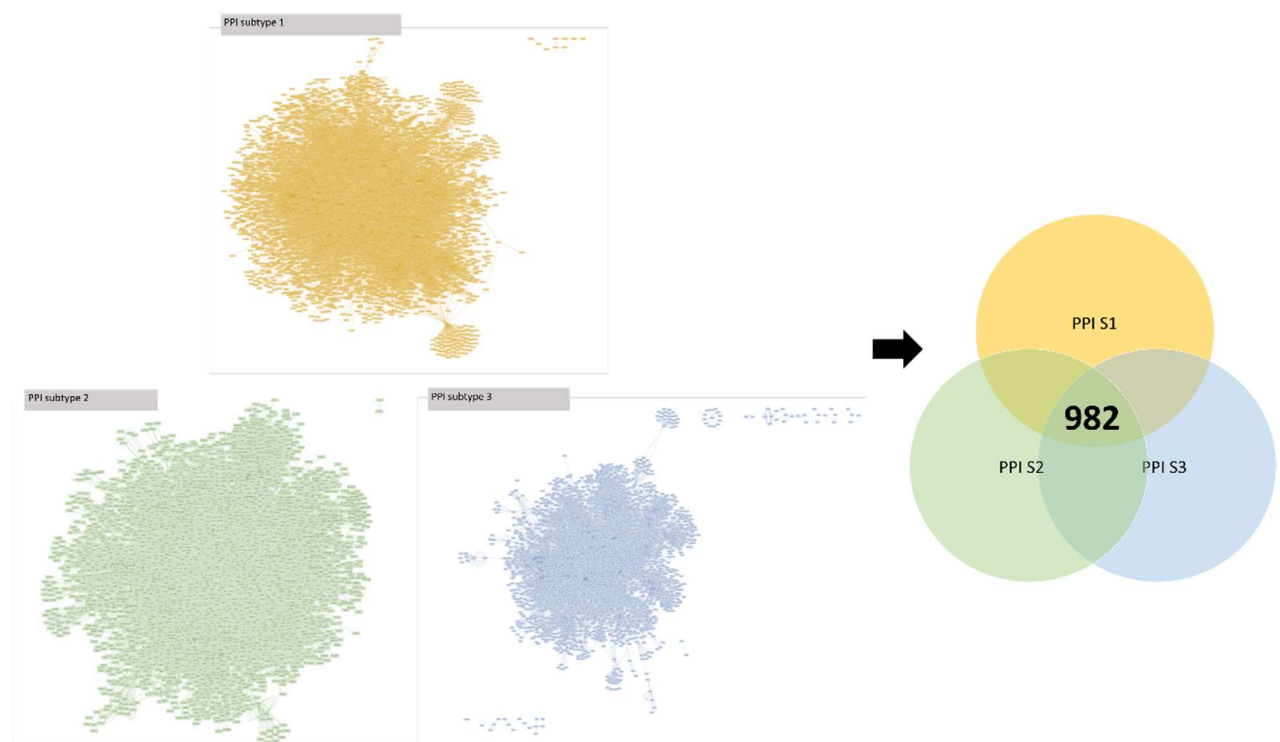

Boyault *et al.* datasets

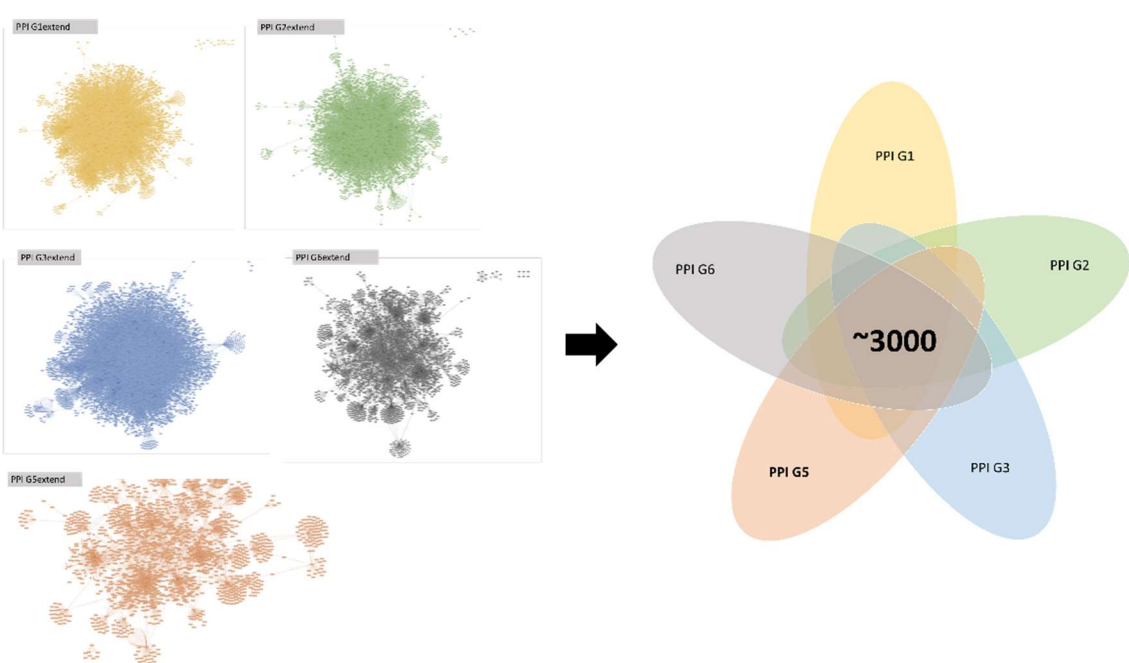

**Figure S1.** Protein-protein interaction (PPI) analysis of the different HCC subtypes and groups from published datasets.

|         | 5-AZA |         |          |         |         |         | SOR   |        |         |          |         |        | siR-PD-L1 |          |          |          |          |         |
|---------|-------|---------|----------|---------|---------|---------|-------|--------|---------|----------|---------|--------|-----------|----------|----------|----------|----------|---------|
|         | H     |         | S1       |         | S2      |         | H     |        | S1      |          | S2      |        | H         |          | S1       |          | S2       |         |
|         | IHH   | HLE     | HLF      | JHH6    | HepG2   | HuH7    | IHH   | HLE    | HLF     | JHH6     | HepG2   | HuH7   | IHH       | HLE      | HLF      | JHH6     | HepG2    | HuH7    |
| AURKA   | 3.00  | 106     | 146      | 138     | 196     | 3.26 ** | 139   | 0.27 * | 183     | 0.99     | 0.17 ** | 104    | 0.33 **   | 0.61     | 0.46 **  | 0.57 **  | 0.87     | 0.24 ** |
| FGR     | 0.04  | 0.48 ** | 0.37 *   | 2.84    | 0.01 *  | 151     | 0.31  | 125    | 0.06 *  | 4.91 *** | 0.93    | 144    | 0.24 **   | 0.49 *   | 0.14 *** | 0.11 *** | 0.21 *** | 0.36 *  |
| EGFR    | 199   | 140 **  | 2.74     | 5.14    | 0.77    | 1.8     | 2.67  | 2.61   | 2.86 ** | 13.01 *  | 0.62    | 124    | 0.42 **   | 0.91 *   | 0.29 *   | 0.77     | 0.73     | 0.82    |
| HGFR    | 0.75  | 165     | 5.04     | 191     | 189     | 3.3     | 159   | 3.06   | 5.56    | 4.28 *   | 0.32 *  | 0.33   | 0.49 **   | 0.76     | 0.32 **  | 1.19     | 0.84     | 0.77    |
| YAP1    | 0.91  | 135     | 2.80 *   | 108     | 155     | 2.00    | 22.36 | 135    | 2.00    | 3.40     | 0.50    | 106    | 0.41      | 0.37     | 0.69 **  | 0.81     | 0.68     | 1.13    |
| FOS     | 158 * | 0.97    | 129      | 145     | 130     | 0.85    | 4.18  | 0.20 * | 0.29 *  | 0.86     | 0.16 ** | 0.17   | 0.38 **   | 0.73 **  | 0.39 **  | 0.34     | 0.80     | 0.82    |
| ASV1    | 151   | 2.01    | 2.79     | 5.80 *  | 2.41 ** | 0.42    | 3.99  | 3.09 * | 2.41 *  | 2.16     | 0.41 *  | 105    | 0.56 **   | 0.92     | 0.35 **  | 1.13     | 105      | 0.72    |
| PRKCA   | 0.67  | 114     | 3.47     | 2.36 *  | 108     | 0.93    | 3.18  | 3.30   | 2.80 ** | 4.28     | 158     | 137    | 0.61      | 0.73 **  | 0.27 **  | 106      | 0.65 **  | 0.58    |
| YES1    | 0.48  | 124     | 4.71     | 0.97    | 103     | 155     | 196   | 2.60 * | 2.76    | 6.26 *   | 0.36 *  | 0.40   | 0.46 **   | 0.77     | 0.33 *   | 121      | 0.66 **  | 0.68    |
| FYN     | 148   | 114     | 8.11     | 3.55 *  | 130     | 0.97    | 2.63  | 3.32 * | 4.08 ** | 4.03 **  | 0.67    | 0.78   | 0.58 **   | 108      | 0.45 *   | 124      | 104      | 0.95    |
| cCBL    | 168   | 190     | 0.68     | 4.09    | 2.27    | 121     | 150   | 3.01   | 0.82    | 7.95     | 0.47    | 1.12   | 0.40 *    | 1.17     | 0.32     | 0.30     | 0.53 *   | 0.70 *  |
| cJun    | 128   | 2.23    | 9.81 *** | 6.87 ** | 2.43    | 0.35 ** | 3.00  | 1.15   | 5.44    | 7.17 *   | 2.68    | 0.59   | 0.28 **   | 182      | 0.02 *** | 0.90     | 0.48     | 102     |
| EP515   | 3.32  | 2.84    | 103      | 4.57 ** | 3.28    | 3.06    | 2.57  | 2.09   | 2.43    | 29.21    | 0.62    | 0.05   | 0.56      | 107      | 0.03 **  | 0.97     | 0.18     | 0.91 ** |
| MDM2    | 186   | 2.28 ** | 3.04     | 135     | 4.88 *  | 1.13    | 7.16  | 104    | 165     | 3.65 *   | 0.85    | 0.04   | 0.92      | 0.64     | 0.02 **  | 0.32 *   | 0.09     | 102 **  |
| PLZF    | 0.33  | 0.49    | 140      | 176     | 0.01 ** | 104     | 161   | 148    | 0.09    | 0.42     | 191     | 0.68   | 0.64      | 3.20 *** | 0.02 **  | 0.08 **  | 0.88 **  | 0.13    |
| DCUN1L1 | 0.56  | 2.33    | 3.99     | 2.18    | 147     | 2.45    | 1.11  | 2.87   | 4.73    | 14.08 ** | 0.64    | 0.06 * | 0.45      | 0.85     | 0.26 *   | 0.97     | 0.38     | 0.77 ** |

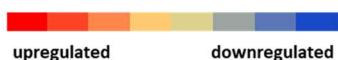

\*  $p < 0.05$   
 \*\*  $p < 0.01$   
 \*\*\*  $p < 0.001$

**Figure S2.** Mean mRNA expression data from at least three independent replicates showing the dysregulation of proto-oncogene upon treatment from the cell lines investigated. Statistical analysis to evaluate the difference between means vs control/untreated cells is indicated in the corresponding p-value (\* $p < 0.05$ , \*\* $p < 0.01$ , \*\*\* $p < 0.001$ ).

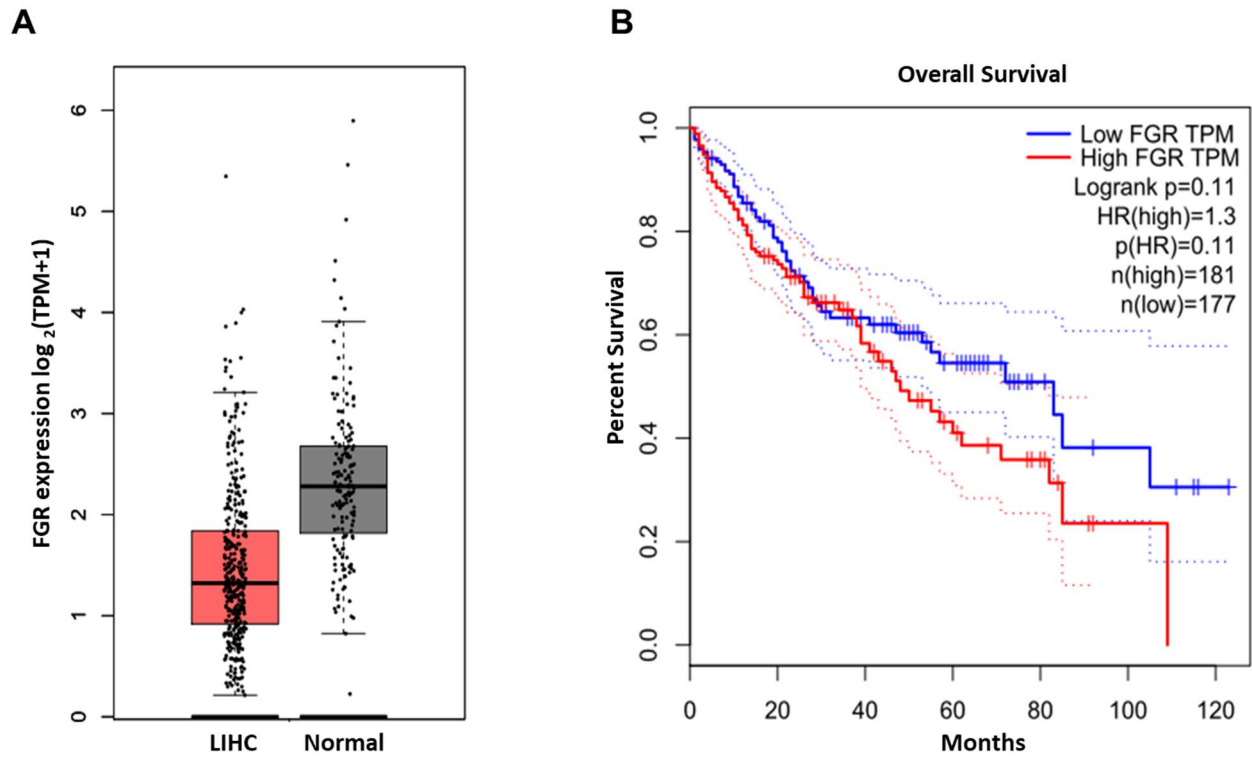

**Figure S3.** The relevance of FGR in clinical samples of LIHC. **(A)** The distribution of FGR in tumoral samples compared to non-tumoral tissues. **(B)** The association of FGR expression in the overall survival of patients. Datasets were taken from TCGA and GTEx databases and visualized by GEPIA online tool. LIHC - Liver hepatocellular carcinoma.
